# Supplementary material for: Cadmium concentrations in human blood and urine are associated with polymorphisms in zinc transporter genes
Source: Royal Society of Chemistry journal article supplement (doi:10.1039/c3mt00365e), 2014-01-01
Supplement: c3mt00365e1.pdf [file c3mt00365e1.pdf]

**Supplementary material**

**Cadmium Concentrations in Human Blood and Urine are Associated with  
Polymorphisms in Zinc Transporter Genes**

Gerda Rentschler, Maria Kippler, Anna Axmon, Rubhana Raqib, Staffan Skerfving, Marie Vahter, Karin Broberg

**Table 1 (supplementary material).** Polymorphisms of the *SLC39A14* and *SLC39A8* genes that were successfully genotyped. Quality requirements: HWE<sup>a</sup> and 90% of samples easily recognized in the mass spectrometry analysis

| Gene            | rs nr <sup>b</sup> | Polymorphism type <sup>c</sup> | Allele frequencies Argentina | QC (%) <sup>a</sup> | Allele frequencies Bangladesh | QC (%) <sup>a</sup> |
|-----------------|--------------------|--------------------------------|------------------------------|---------------------|-------------------------------|---------------------|
| <i>SLC39A14</i> | rs870215           | Intron A>G                     | 10/90                        | 97                  | 16/84                         | 96                  |
|                 | rs896377           | Intron C>G                     | 4/96                         | 97                  | 22/78                         | 97                  |
|                 | rs896378           | P33L T>C                       | 48/52                        | 98                  | 43/57                         | 99                  |
|                 | rs1051638          | 3' UTR G>A                     | 44/56                        | 98                  | 45/55                         | 98                  |
|                 | rs2293144          | L65L A>G                       | 40/60                        | 98                  | 37/63                         | 99                  |
|                 | rs4872479          | Intron T>G                     | 7/93                         | 97                  | 7/93                          | 96                  |
|                 | rs7818776          | Intron A>C                     | 55/45                        | 96                  | 39/61                         | 95                  |
|                 | rs11783730         | Intron T>C                     | 48/52                        | 97                  | 33/67                         | 99                  |
|                 | rs11989798         | Intron C>A                     | 3/97                         | 96                  | 13/87                         | 95                  |
|                 | rs13259873         | Intron T>C                     | 51/49                        | 98                  | 47/53                         | 99                  |
|                 | <i>SLC39A8</i>     | rs9705                         | 3' UTR A>G                   | 60/40               | 98                            | 23/77               |
| rs233804        |                    | Intron A>C                     | 8/92                         | 97                  | 36/64                         | 100                 |
| rs233818        |                    | Intron T>C                     | 63/37                        | 95                  | 27/73                         | 97 (*)              |
| rs233825        |                    | Intron G>A                     | 12/88                        | 97                  | 36/64                         | 98 (*)              |
| rs233827        |                    | Intron A>G                     | 15/85                        | 96                  | 53/47                         | 98                  |
| rs390878        |                    | Intron T>C                     | 60/40                        | 96                  | 28/72                         | 98                  |
| rs971752        |                    | Intron G>A                     | 16/84                        | 97                  | 26/74                         | 97                  |
| rs998719        |                    | Intron C>T                     | 11/89                        | 96                  | 22/78                         | 98                  |
| rs1462947       |                    | Intron A>G                     | -                            | 84(**)              | 32/68                         | 92                  |
| rs1545744       |                    | Intron T>A                     | 16/84                        | 100                 | 25/75                         | 99                  |
| rs2165265       |                    | Intron G>T                     | 23/77                        | 93 (*)              | 20/80                         | 96                  |
| rs4699011       |                    | Intron T>C                     | 16/84                        | 98                  | 26/74                         | 99                  |
| rs6822371       |                    | Intron T>G                     | 19/81                        | 97                  | 30/70                         | 98                  |
| rs6829701       |                    | Intron A>G                     | 10/90                        | 97                  | 31/69                         | 99                  |
| rs6848517       |                    | Intron C>G                     | 70/30                        | 97                  | 38/62                         | 100                 |
| rs7436937       |                    | Intron T>G                     | 70/30                        | 97                  | 37/63                         | 95                  |
| rs7655493       |                    | Intron C>T                     | 27/73                        | 92                  | 37/63                         | 94                  |
| rs7664683       |                    | Intron T>C                     | 2/98                         | 97                  | 23/77                         | 99                  |
| rs7681239       |                    | Intron C>T                     | 3/97                         | 96                  | 18/82                         | 93                  |
| rs10014145      |                    | Intron G>A                     | 13/87                        | 98                  | 36/64                         | 97                  |
| rs11941736      |                    | Intron C>G                     | 10/90                        | 98                  | 30/70                         | 98                  |
| rs13103835      |                    | Intron G>A                     | 19/81                        | 97                  | 30/70                         | 98                  |
| rs13107325      |                    | A391T G>A                      | 1/99                         | 98                  | 1/99                          | 99                  |
| rs17032363      |                    | 3' UTR G>A                     | 0/100                        | 97                  | 1/99                          | 94                  |
| rs17226148      |                    | Intron G>A                     | 7/93                         | 96                  | 13/87                         | 98                  |
| rs17823966      |                    | H347H C>T                      | 0/100                        | 100                 | 8/92                          | 99                  |

<sup>a</sup> If there was Hardy-Weinberg disequilibrium in both populations, the polymorphism was excluded. Polymorphisms that demonstrated disequilibrium in one of the populations are marked with (\*). A polymorphism was excluded in one population for quality reasons (\*\*).

<sup>b</sup> Rs numbers from NCBI SNP Database (website: <http://www.ncbi.nlm.nih.gov/SNP>).

<sup>c</sup> When applicable, amino acid position/gene region is denoted.

**Table 2 (supplementary material).** Modification by SNPs of putative transcription factor binding sites.

| Gene<br>SNP            | Allele | Effect | Site affected<br>Family/Factor | Description                       |
|------------------------|--------|--------|--------------------------------|-----------------------------------|
| <b><i>SLC39A14</i></b> |        |        |                                |                                   |
| rs4872479              | G -> T | lost   | CEBP/CEBP02                    | CCAAT/enhancer<br>binding protein |
| rs870215               | G -> A | new    | HOXH/MEIS1A_HOXA               | Meis homeobox 1                   |
| <b><i>SLC39A8</i></b>  |        |        |                                |                                   |
| rs10014145             | A -> G | lost   | NKXH/NKX31                     | NK3 homeobox 1,<br>NKX-3 ALPHA    |
| rs233804               | C -> A | new    | TALE/MRG1                      | Meis homeobox 2<br>(Meis2)        |

**Table 3 (supplementary material).** Expression probes for *SLC39A8* and *SLC39A14*.

| Gene            | Probe No     | Sequence                                                        | Median <sup>a</sup><br>(min-max) |
|-----------------|--------------|-----------------------------------------------------------------|----------------------------------|
| <i>SLC39A8</i>  | ILMN_1695316 | GGTTGCACCCCTCACAAATGGCAGAACAGTATGTAAAGCTGGTAACACCT <sup>b</sup> | 155 (110-210)                    |
|                 | ILMN_2233539 | GTGTGATCGAGAGCCATTCAGAAAAGACTTCCTTTGTGTTCAGCCTATAC <sup>b</sup> | 163 (97-280)                     |
| <i>SLC39A14</i> | ILMN_1764629 | TGTCACGTGCAGGAACAGTGAGGCAGGGACAGGGGTTCTGCTCCTTCTCA <sup>c</sup> | 102 (83-120)                     |

<sup>a</sup> Expression in relative fluorescence units.

<sup>b</sup> Located on exon 8b covering transcripts 1, 2 and 4 but not 3 ([www.ncbi.nih.gov/nucleotide](http://www.ncbi.nih.gov/nucleotide)).

<sup>c</sup> Located on exon 11 covering transcripts 1, 2 and 3 ([www.ncbi.nih.gov/nucleotide](http://www.ncbi.nih.gov/nucleotide)).

**Table 4 (supplementary material).** Spearman's correlation coefficients ( $r_s$ ) between cadmium levels in erythrocytes (Ery-Cd), blood (B-Cd) and urine (U-Cd), plasma zinc (P-Zn), ferritin in plasma, age and parity in the Bangladeshi and Argentinean Andes populations.

|        |       | Parity |            | Ery-Cd <sup>a</sup> |            | B-Cd               |            | U-Cd               |            | P-Zn  |            | Plasma Ferritin    |            |
|--------|-------|--------|------------|---------------------|------------|--------------------|------------|--------------------|------------|-------|------------|--------------------|------------|
|        |       | Andes  | Bangladesh | Andes <sup>b</sup>  | Bangladesh | Andes <sup>b</sup> | Bangladesh | Andes <sup>b</sup> | Bangladesh | Andes | Bangladesh | Andes <sup>b</sup> | Bangladesh |
| Age    | $r_s$ | 0.63   | 0.76       | 0.33                | 0.21       | 0.40               | —          | 0.42               | 0.28       | 0.24  | -0.08      | 0.50               | 0.03       |
|        | P     | <0.001 | <0.001     | <0.001              | <0.001     | <0.001             | —          | <0.001             | <0.001     | 0.002 | 0.1        | <0.001             | 0.6        |
|        | N     | 167    | 403        | 172                 | 400        | 172                | —          | 172                | 340        | 157   | 399        | 166                | 399        |
| Parity | $r_s$ |        |            | 0.33                | 0.19       | 0.40               | —          | 0.41               | 0.31       | 0.25  | -0.08      | 0.30               | 0.03       |
|        | P     |        |            | <0.001              | <0.001     | <0.001             | —          | <0.001             | <0.001     | 0.002 | 0.1        | <0.001             | 0.6        |
|        | N     |        |            | 167                 | 400        | 167                | —          | 167                | 340        | 154   | 399        | 161                | 399        |
| Ery-Cd | $r_s$ |        |            |                     |            | 0.97               | —          | 0.42               | 0.47       | 0.03  | -0.02      | -0.09              | -0.18      |
|        | P     |        |            |                     |            | <0.001             | —          | <0.001             | <0.001     | 0.7   | 0.6        | 0.3                | <0.001     |
|        | N     |        |            |                     |            | 172                | —          | 172                | 337        | 157   | 396        | 166                | 396        |
| B-Cd   | $r_s$ |        |            |                     |            |                    |            | 0.45               | —          | 0.11  | —          | 0.03               | —          |
|        | P     |        |            |                     |            |                    |            | <0.001             | —          | 0.2   | —          | 0.7                | —          |
|        | N     |        |            |                     |            |                    |            | 172                | —          | 157   | —          | 166                | —          |
| U-Cd   | $r_s$ |        |            |                     |            |                    |            |                    |            | 0.20  | -0.07      | 0.21               | -0.10      |
|        | P     |        |            |                     |            |                    |            |                    |            | 0.01  | 0.2        | 0.008              | 0.06       |
|        | N     |        |            |                     |            |                    |            |                    |            | 157   | 336        | 166                | 336        |
| P-Zn   | $r_s$ |        |            |                     |            |                    |            |                    |            |       |            | 0.18               | 0.06       |
|        | P     |        |            |                     |            |                    |            |                    |            |       |            | 0.02               | 0.3        |
|        | N     |        |            |                     |            |                    |            |                    |            |       |            | 156                | 397        |

<sup>a</sup> Cd in erythrocytes calculated in Argentinean Andes, measured in Bangladesh.

<sup>b</sup> Numbers for Argentinean Andes quoted from EHP, 121 (4) 2013, 467-472.

— Not measured.

**Table 5 (supplementary material).** Gene expression (relative units) as a function of genotype measured in a subset of the Andean population (P-values of Kruskal-Wallis test).

| Gene            | SNP | Genotype        | Median     | Range            | N         | P-value      |     |
|-----------------|-----|-----------------|------------|------------------|-----------|--------------|-----|
| <i>SLC39A14</i> |     |                 |            |                  |           |              |     |
| rs4872479       |     | GG              | 101        | 83 - 120         | 61        | 0.7          |     |
|                 |     | GT              | 100        | 92 - 110         | 10        |              |     |
| rs870215        |     | GG              | 101        | 83 - 120         | 58        | 0.8          |     |
|                 |     | AG/AA           | 100        | 92 - 110         | 13        |              |     |
| <i>SLC39A8</i>  |     |                 |            |                  |           |              |     |
| rs10014145      |     | AA <sup>a</sup> | 155        | 110 - 210        | 61        | 1.0          |     |
|                 |     | AG/GG           | 158        | 120 - 180        | 11        |              |     |
|                 |     | AA <sup>b</sup> | 155        | 97 - 280         | 61        |              | 0.2 |
|                 |     | AG/GG           | 145        | 110 - 230        | 11        |              |     |
| rs233804        |     | CC <sup>a</sup> | <b>157</b> | <b>110 - 210</b> | <b>65</b> | <b>0.049</b> |     |
|                 |     | CA/AA           | <b>140</b> | <b>120 - 160</b> | <b>7</b>  |              |     |
|                 |     | CC <sup>b</sup> | 155        | 97 - 280         | 65        |              | 0.3 |
|                 |     | CA/AA           | 145        | 110 - 180        | 7         |              |     |

<sup>a</sup> Probe ILMN\_1695316.

<sup>b</sup> Probe ILMN\_2233539.

**Table 6 (supplementary material).** Spearman's rho correlation between expression of *SLC39A8* and metal biomarkers in a subset of the Andean population, both for total expression (A) and per genotype of rs10014145 and rs233804 (B).

| A. Total expression          |                |       |       |       |          |
|------------------------------|----------------|-------|-------|-------|----------|
|                              |                | B-Cd  | U-Cd  | P-Zn  | ferritin |
| SLC39A8 <sup>a</sup>         | r <sub>S</sub> | -0.02 | -0.07 | -0.09 | -0.06    |
|                              | P              | 0.9   | 0.6   | 0.5   | 0.6      |
|                              | N              | 72    | 72    | 64    | 70       |
| SLC39A8 <sup>b</sup>         | r <sub>S</sub> | 0.08  | 0.00  | 0.02  | -0.22    |
|                              | P              | 0.5   | 0.9   | 0.9   | 0.07     |
|                              | N              | 72    | 72    | 64    | 70       |
| B Expression by SNP/Genotype |                |       |       |       |          |
| rs10014145                   |                |       |       |       |          |
| AA <sup>a</sup>              | r <sub>S</sub> | 0.01  | -0.09 | -0.13 | -0.01    |
|                              | P              | 0.9   | 0.5   | 0.3   | 0.9      |
|                              | N              | 61    | 61    | 54    | 60       |
| AG/GG <sup>a</sup>           | r <sub>S</sub> | -0.19 | 0.04  | 0.05  | -0.26    |
|                              | P              | 0.6   | 0.9   | 0.9   | 0.5      |
|                              | N              | 11    | 11    | 10    | 10       |
| AA <sup>b</sup>              | r <sub>S</sub> | 0.10  | -0.01 | -0.01 | -0.21    |
|                              | P              | 0.5   | 0.9   | 0.9   | 0.1      |
|                              | N              | 61    | 61    | 54    | 60       |
| AG/GG <sup>b</sup>           | r <sub>S</sub> | 0.02  | 0.31  | 0.08  | -0.15    |
|                              | P              | 0.9   | 0.4   | 0.8   | 0.7      |
|                              | N              | 11    | 11    | 10    | 10       |
| rs233804                     |                |       |       |       |          |
| CC <sup>a</sup>              | r <sub>S</sub> | 0.05  | -0.10 | -0.12 | -0.08    |
|                              | P              | 0.7   | 0.4   | 0.4   | 0.5      |
|                              | N              | 65    | 65    | 57    | 63       |
| CA/AA <sup>a</sup>           | r <sub>S</sub> | 0.14  | 0.00  | 0.40  | 0.11     |
|                              | P              | 0.8   | 1.0   | 0.4   | 0.8      |
|                              | N              | 7     | 7     | 7     | 7        |
| CC <sup>b</sup>              | r <sub>S</sub> | 0.18  | -0.01 | 0.01  | -0.22    |
|                              | P              | 0.1   | 0.9   | 0.9   | 0.08     |
|                              | N              | 65    | 65    | 57    | 63       |
| CA/AA <sup>b</sup>           | r <sub>S</sub> | -0.43 | -0.18 | 0.05  | -0.43    |
|                              | P              | 0.3   | 0.7   | 0.9   | 0.3      |
|                              | N              | 7     | 7     | 7     | 7        |

<sup>a</sup> Probe ILMN\_1695316.

<sup>b</sup> Probe ILMN\_2233539.
